# Supplementary material for: Neuropeptide Y2 Receptor (NPY2R) Expression in Saliva Predicts Feeding Immaturity in the Premature Neonate
Source: PLoS One. 2012 May 21;7(5):e37870. doi: 10.1371/journal.pone.0037870 (PMC3357390; doi:10.1371/journal.pone.0037870)
Supplement: Table S1 — Complete subject demographic and clinical information. (XLSX) [file pone.0037870.s001.xlsx]

## Sheet: Sheet1
	Table 1: Demographic and Clinical Information
Sample ID	Subject	Sample	Post-Conceptual Age (weeks)	Gender	Weight (kg)	Feeding status	NPY2R	Clinical Sequelae
16-4	1	1	30.57	M	1.33	FPG	+	respiratory distress syndrome, patent ductus arteriosus, right grade I intraventricular hemorrhage, apnea
21-1	2	1	28	F	1.036	NPO	+	resp distress syndrome, leukocytosis, hyperbilirubinemia, apnea, metabolic acidosis
21-3		2	29.47	F	0.954	FPG	+
22-1	3	1	31.43	M	1.666	NPO	+	resp distress syndrome, neonatal abstinence syndrome, undescended testes, metabolic acidosis and hyperbilirubinemia both resolved
22-4		2	35.14	M	2.113	PPO	+
23-3	4	1	33.86	F	?	FPG	+	RDS, neutropenia, anemia, peripheral pulmonary stenosis murmur, metabolic acidosis resolved
26-1	5	1	31.57	M	2.187	PPG	+	transient tachypnea, hyperbilirubinemia
26-2		2	32.57	M	2.119	FPG	+
27-3	6	1	32.43	M	0.968	FPG	+	IUGR, Resolved RDS hyperbilirubinemia metabolic acidosis
28-2	7	1	29.14	M	0.957	PPG	+	RDS
28-3		2	30.43	M	1.18	FPG	+
28-4		3	31	M	1.151	FPG	-
31C-1	8	1	32.14	M	1.962	NPO	+	multiple gestation, RDS, narcotic exposure
31C-3		2	33.71	M	2	FPG	-
31D-1	9	1	32.14	M	1.678	NPO	+	multiple gestation, RDS, narcotic exposure
31D-3		2	33.71	M	1.737	FPG	+
33-1	10	1	33.57	M	2.047	NPO	-	ABO incompatibility, hyperbilirubinemia
33-3		2	34.43	M	2.05	FPO	-
36-4	11	1	34.43	F	1.75	PPO	+	sickle cell trait/disease?
37-1	12	1	29.71	M	1.763	NPO	+	hyperbilirubinemia
37-5		2	34.71	M	2.459	PPO	-
41A-3	13	1	34.14	F	1.638	PPO	+	RDS, hyperbilirubinemia
41B-2	14	1	34.14	F	1.393	NPO	+	Type C tracheoesophageal fistula with repair, RDS, hyperbilirubinemia
42-1	15	1	32.14	M	1.362	NPO	+	RDS
42-2		2	32.43	M	1.36	PGF	-
47-1	16	1	32.43	M	1.874	NPO	-	jaundice
50-2	17	1	30.71	M	1.225	PGF	+	apnea, RD, PPROM
50-3		2	31.43	M	1.272	FGF	+
51A-3	18	1	29.86	M	1.107	FGF	+	RDS, metabolic acidosis, hyperbilirubinemia
51B-2	19	1	28.86	M	0.902	PGF	+	resp distress, metabolic acidosis
51B-3		2	29.86	M	1.058	FGF	+
52A-3	20	1	32.71	F	1.664	FGF	-	di-di twin gestation, mild resp distress
52B-3	21	1	32.71	F	1.584	FGF	-	di-di twin gestation, mild resp distress
53-1	22	1	36.14	F	1.196	NPO	-	intrauterine growth restriction, jaundice, thrombocytopenia
53-5		2	39.14	F	1.445	PPO	-
54-1	23	1	41.57	M	3.845	PGF	-	RDS, left pneumothorax, persistent pulmonary hypertension
56-2	24	1	34.57	M	1.989	PPO	+	apnea, maternal drug exposure
57-1	25	1	34.43	F	1.668	FPG	+	RDS, CLD, hyperbilirubinemia, elbow contractures, sacral groove
57-4		2	37.29	F	2.122	FPO	+
58-2	26	1	32.43	M	1.246	PGF	-	RDS, hyperbilirubinemia, apnea
59-1	27	1	28.86	M	1.24	NPO	+	RDS, apena, anemia
59-2		2	29.14	M	1.25	PGF	+
59-3		3	30.57	M	1.472	FGF	+
59-4		4	31.47	M	1.648	FGF	+
59-5		5	33.57	M	2.215	FGF	-
61A-2	28	1	29.57	F	1.226	PGF	+	twin, RDS, nutritional support, apnea, hyperbilirubinemia, bacteremia
61A-4		2	32.57	F	1.762	FGF	-
61B-1	29	1	28.86	F	1.295	NPO	+	twin, RDS, nutritional support, apnea, hyperbilirubinemia
61B-3		2	30.57	F	1.344	FGF	+
61B-4		3	32.57	F	1.725	FGF	+
62-4	30	1	29	M	1.03	PGF	+	Resp distress, muscular VSD, apnea
62-5		2	37	M	?	PPO	+
63-3	31	1	30.86	M	1.56	NPO	-	RDS, footling breech, jaundice
64-1	32	1	30.43	F	1.433	PGF	-	apnea, metabolic acidosis, physiologic jaundice, germinal matrix hemorrhage on left
64-2		2	30.86	F	1.451	PGF	+
65A-1	33	1	30.71	M	1.135	PGF	+	twin, hyperbilirubinemia, apnea
65A-2		2	31.57	M	1.161	FGF	-
65B-1	34	1	30.71	M	1.365	PGF	+	twin, RDS, hyperbilirubinemia, apnea
65B-2		2	31.57	M	1.347	FGF	+
66A-1	35	1	27.43	F	0.93	NPO	-	RDS, patent ductus arteriosis, bronchopulmonary dysplasia, immature retinas
66A-3		2	28.29	F	0.995	PGF	-
66A-4		3	29.86	F	0.981	FGF	+
66A-5		4	34.43	F	1.476	FGF	+
66B-1	36	1	27.43	F	0.73	NPO	-	bronchopulmonary dysplasia, RDS PDA, immature retinas
66B-3		2	28.29	F	0.78	PGF	+
66B-5		3	34.43	F	1.298	FGF	-
67-1	37	1	25.57	M	0.99	NPO	+	Resp distress, ELBW, methadone exposure
67-5		2	28.71	M	0.929	FGF	-
68-4	38	1	33.43	M	1.896	FGF	+	resp distress, metabolic acidosis, chronic lung disease, hypertension, hemangioma
68-8		2	36.57	M	2.438	PPO	-
69A-3	39	1	32.86	M	1.849	FGF	+	resp distress, twin
69A-7		2	34.29	M	2.297	PPO	-
69B-2	40	1	32.43	M	0.57	PGF	-	severe and asymmetric intrauterine growth restriction, hypoglycemia, resp distress, coagulopathy, thrombocytopenia
69B-8		2	37.71	M	0.911	FGF	+
70A-5	41	1	35.29	F	1.508	FGF	-	small for gestational age
70A-7		2	35.86	F	1.482	PPO	-
70B-5	42	1	35.29	F	1.604	PPO	-	small for gestational age, resolved hyperbilirubinemia
70B-8		2	36.14	F	1.775	PPO	-
71-1	43	1	28.43	M	1.085	PGF	-	resp distress secondary to surfactant deficiency, hyperbilirubinemia, apnea, anemia
71-2		2	29.29	M	1.216	PGF	-
72-1	44	1	29.57	M	1.278	FGF	+	resp distress secondar to surfactant deficiency, pneumonia, physiologic jaundice
74-1	45	1	34.14	F	2.016	FPO	-
75-3	46	1	34.14	F	1.003	FGF	-	laryngomalacia, patent ductus arteriosus
76-1	47	1	29.29	F	1.06	NPO	-	urinary tract infection, patent foramen ovale, mild vavular pulmonary stenosis
77-3	48	1	35.57	M	1.981	PPG	-	Tracheoesophagel fistula, esophageal and duodenal atresia, intestinal malrotation, ABO incompatibility, hyperbilirubinemia, undescended tesiticle
91-8	49	1	37	F	2.758	PPO	+	bronchopulmonary dysplasia
98-1	50	1	33.57	M	1.807	FPO	-	physiologic jaundice
102-4	51	1	31.71	M	1.794	FGF	+	RDS, polydactyly of right foot
104A-3	52	1	32.57	M	1.636	FGF	+	transient tachypnea, hyperbilirubinemia, twin-to-twin transfusion syndrome
104B-3	53	1	32.57	M	1.924	FGF	-	transient tachypnea, hyperbilirubinemia, twin-to-twin transfusion syndrome, recipient baby
106	54	1	41.29	F	3.676	PPO	+
RTF1-2	55	1	35.57	M	2.136	PPO	+
RTF2-2	56	1	33.86	F	2.136	PPO	+	resp distress
RTF3-2	57	1	36.86	F	1.733	PPO	+	IUGR, polycythemia, sacrococcygeal indent
RTF4A-10	58	1	35.29	M	2.208	PPO	-	RDS, jaundice, nutritional support
RTF4A-5		2	34.29	M	1.938	PPO	-
RTF4B-10	59	1	35.29	M	2.415	FPO	+	RDS, jaundice, nutritional support
RTF4B-5		2	34.29	M	2.165	PPO	-
RTF5A-2	60	1	33.86	F	1.463	PPO	+	IUGR, resp distress, hypermagnesemia
RTF5B-1	61	1	33.71	F	2.136	NPO	+	resp distress, right partial membranous choanal atresia, anal fissure
RTF5B-5		2	34.57	F	2.126	PPO	+
RTF8A-2	62	1	33.86	M	1.65	PPO	-	twin-to-twin transfusion syndrome, polycythemia, RDS, thrombocytopenia, mild bilateral hydronephrosis
RTF8B-2	63	1	33.86	M	1.49	PPO	-	twin-to-twin transfusion syndrome, anemia, apnea
T-41	64	1	38.57	F	3.733	FPO	-	all birthweights, not weight at collection
T-42	65	1	39	M	3.073	FPO	-
T-43	66	1	40.43	F	2.644	FPO	-
T-44	67	1	40	F	2.899	FPO	-
T-45	68	1	38.57	F	3.621	FPO	-
T-46	69	1	39.14	M	3.623	FPO	-
T-47	70	1	40.29	M	2.769	FPO	-
T-48	71	1	38.86	F	2.996	FPO	-
T-49	72	1	39.43	F	3.235	FPO	+
T-50	73	1	39.71	M	3.459	FPO	-
T-51A	74	1	38.43	F	2.785	FPO	-
T-51B	75	1	38.43	M	2.495	FPO	-
T-52	76	1	39.71	F	3.91	FPO	-

## Sheet: Sheet2
Table 1: Demographic and Clinical Information
Subject	Sample	Post-Conceptual Age (weeks)	Gender	Weight (kg) at collection	Feeding status	NPY2R	Clinical Sequelae
1	1	30.57	M	1.33	FPG	+	Respiratory distress syndrome (RDS), patent ductus arteriosus, right grade I intraventricular hemorrhage (IVH), apnea
2	1	28	F	1.036	NPO	+	RDS, leukocytosis, hyperbilirubinemia, apnea, metabolic acidosis
	2	29.47	F	0.954	FPG	+
3	1	31.43	M	1.666	NPO	+	RDS, neonatal abstinence syndrome, undescended testes, metabolic acidosis, hyperbilirubinemia
	2	35.14	M	2.113	PPO	+
4	1	33.86	F	1.515	FPG	+	RDS, neutropenia, anemia, peripheral pulmonary stenosis, metabolic acidosis
5	1	31.57	M	2.187	PPG	+	Transient tachypnea, hyperbilirubinemia
	2	32.57	M	2.119	FPG	+
6	1	32.43	M	0.968	FPG	+	Intrauterine growth restriction (IUGR), RDS, hyperbilirubinemia, metabolic acidosis
7	1	29.14	M	0.957	PPG	+	RDS
	2	30.43	M	1.18	FPG	+
	3	31	M	1.151	FPG	-
8	1	32.14	M	1.962	NPO	+	Multiple gestation, RDS, narcotic exposure
	2	33.71	M	2	FPG	-
9	1	32.14	M	1.678	NPO	+	Multiple gestation, RDS, narcotic exposure
	2	33.71	M	1.737	FPG	+
10	1	33.57	M	2.047	NPO	-	ABO incompatibility, hyperbilirubinemia
	2	34.43	M	2.05	FPO	-
11	1	34.43	F	1.75	PPO	+
12	1	29.71	M	1.763	NPO	+	Hyperbilirubinemia
	2	34.71	M	2.459	PPO	-
13	1	34.14	F	1.638	PPO	+	RDS, hyperbilirubinemia
14	1	34.14	F	1.393	NPO	+	Type C tracheoesophageal fistula with repair, RDS, hyperbilirubinemia
15	1	32.14	M	1.362	NPO	+	RDS
	2	32.43	M	1.36	PGF	-
16	1	32.43	M	1.874	NPO	-	Hyperbilirubinemia
17	1	30.71	M	1.225	PGF	+	Apnea, RDS
	2	31.43	M	1.272	FGF	+
18	1	29.86	M	1.107	FGF	+	RDS, metabolic acidosis, hyperbilirubinemia
19	1	28.86	M	0.902	PGF	+	RDS, metabolic acidosis
	2	29.86	M	1.058	FGF	+
20	1	32.71	F	1.664	FGF	-	Multiple gestation, RDS
21	1	32.71	F	1.584	FGF	-	Multiple gesation, RDS
22	1	36.14	F	1.196	NPO	-	Intrauterine growth restriction, jaundice, thrombocytopenia
	2	39.14	F	1.445	PPO	-
23	1	41.57	M	3.845	PGF	-	RDS, pneumothorax, persistent pulmonary hypertension (PPHN)
24	1	34.57	M	1.989	PPO	+	Apnea, maternal drug exposure
25	1	34.43	F	1.668	FPG	+	RDS, bronchopulmonary dysplasia (BPD), hyperbilirubinemia, elbow contractures, sacral groove
	2	37.29	F	2.122	FPO	+
26	1	32.43	M	1.246	PGF	-	RDS, hyperbilirubinemia, apnea
27	1	28.86	M	1.24	NPO	+	RDS, apena, anemia
	2	29.14	M	1.25	PGF	+
	3	30.57	M	1.472	FGF	+
	4	31.47	M	1.648	FGF	+
	5	33.57	M	2.215	FGF	-
28	1	29.57	F	1.226	PGF	+	Multiple gestation, RDS, apnea, hyperbilirubinemia, bacteremia
	2	32.57	F	1.762	FGF	-
29	1	28.86	F	1.295	NPO	+	Multiple gestation, RDS, apnea, hyperbilirubinemia
	2	30.57	F	1.344	FGF	+
	3	32.57	F	1.725	FGF	+
30	1	29	M	1.03	PGF	+	RDS, muscular ventricular sepatl defect (VSD), apnea
	2	37	M	2.139	PPO	+
31	1	30.86	M	1.56	NPO	-	RDS,hyperbilirubinemia
32	1	30.43	F	1.433	PGF	-	Apnea, metabolic acidosis, hyperbilirubinemia, Grade 1 IVH
	2	30.86	F	1.451	PGF	+
33	1	30.71	M	1.135	PGF	+	Multiple gestation, hyperbilirubinemia, apnea
	2	31.57	M	1.161	FGF	-
34	1	30.71	M	1.365	PGF	+	Multiple gestation, RDS, hyperbilirubinemia, apnea
	2	31.57	M	1.347	FGF	+
35	1	27.43	F	0.93	NPO	-	RDS, patent ductus arteriosis, BPD
	2	28.29	F	0.995	PGF	-
	3	29.86	F	0.981	FGF	+
	4	34.43	F	1.476	FGF	+
36	1	27.43	F	0.73	NPO	-	RDS, BPD, PDA
	2	28.29	F	0.78	PGF	+
	3	34.43	F	1.298	FGF	-
37	1	25.57	M	0.99	NPO	+	RDS, methadone exposure
	2	28.71	M	0.929	FGF	-
38	1	33.43	M	1.896	FGF	+	RDS, metabolic acidosis, BPD, hypertension, hemangioma
	2	36.57	M	2.438	PPO	-
39	1	32.86	M	1.849	FGF	+	RDS, multiple gestation
	2	34.29	M	2.297	PPO	-
40	1	32.43	M	0.57	PGF	-	Severe and asymmetric IUGR, hypoglycemia, RDS, coagulopathy, thrombocytopenia
	2	37.71	M	0.911	FGF	+
41	1	35.29	F	1.508	FGF	-	Small for gestational age (SGA)
	2	35.86	F	1.482	PPO	-
42	1	35.29	F	1.604	PPO	-	SGA, hyperbilirubinemia
	2	36.14	F	1.775	PPO	-
43	1	28.43	M	1.085	PGF	-	RDS, hyperbilirubinemia, apnea, anemia
	2	29.29	M	1.216	PGF	-
44	1	29.57	M	1.278	FGF	+	RDS, pneumonia, hypberbilirubinemia
45	1	34.14	F	2.016	FPO	-
46	1	34.14	F	1.003	FGF	-	Laryngomalacia, PDA
47	1	29.29	F	1.06	NPO	-	Urinary tract infection, patent foramen ovale, mild vavular pulmonary stenosis
48	1	35.57	M	1.981	PPG	-	polyhydramnios, possible tracheoesophageal fistula and esophageal atresia, possible duodenal atresia, ABO incompatibility, right pneumothorax, left undescended testicle, hyperbilirubinemia, G tube advancing PO skills
49	1	37	F	2.758	PPO	+	BPD
50	1	33.57	M	1.807	FPO	-	Hyperbilirubinemia
51	1	31.71	M	1.794	FGF	+	RDS, polydactyly of right foot
52	1	32.57	M	1.636	FGF	+	Transient tachypnea, hyperbilirubinemia, twin-to-twin transfusion syndrome (donor)
53	1	32.57	M	1.924	FGF	-	Transient tachypnea, hyperbilirubinemia, twin-to-twin transfusion syndrome, (recipient)
54	1	41.29	F	3.676	PPO	+
55	1	35.57	M	2.136	PPO	+
56	1	33.86	F	2.136	PPO	+	RDS
57	1	36.86	F	1.733	PPO	+	IUGR, polycythemia
58	1	35.29	M	2.208	PPO	-	RDS, hyperbilirubinemia
	2	34.29	M	1.938	PPO	-
59	1	35.29	M	2.415	FPO	+	RDS, hyperbilirubinemia
	2	34.29	M	2.165	PPO	-
60	1	33.86	F	1.463	PPO	+	IUGR, RDS, hypermagnesemia
61	1	33.71	F	2.136	NPO	+	RDS, right partial membranous choanal atresia, anal fissure
	2	34.57	F	2.126	PPO	+
62	1	33.86	M	1.65	PPO	-	Twin-to-twin transfusion syndrome (recipient), polycythemia, RDS, thrombocytopenia, mild bilateral hydronephrosis
63	1	33.86	M	1.49	PPO	-	Twin-to-twin transfusion syndrome (donor), anemia, apnea
64	1	38.57	F	3.733	FPO	-
65	1	39	M	3.073	FPO	-
66	1	40.43	F	2.644	FPO	-
67	1	40	F	2.899	FPO	-
68	1	38.57	F	3.621	FPO	-
69	1	39.14	M	3.623	FPO	-
70	1	40.29	M	2.769	FPO	-
71	1	38.86	F	2.996	FPO	-
72	1	39.43	F	3.235	FPO	+
73	1	39.71	M	3.459	FPO	-
74	1	38.43	F	2.785	FPO	-
75	1	38.43	M	2.495	FPO	-
76	1	39.71	F	3.91	FPO	-

## Sheet: Sheet3
Table S1
Subject	Sample(s)	Post-Conceptual Age (weeks)	Gender	Weight (kg) at collection	Clinical Sequelae
1	1	30.57	M	1.33	Respiratory distress syndrome (RDS), patent ductus arteriosus (PDA), right grade I intraventricular hemorrhage (IVH), apnea
2	1, 2	28, 29.47	F	1.036, 0.954	RDS, leukocytosis, hyperbilirubinemia, apnea, metabolic acidosis
3	1, 2	31.43, 35.14	M	1.666, 2.133	RDS, neonatal abstinence syndrome, undescended testes, metabolic acidosis, hyperbilirubinemia
4	1	33.86	F	1.515	RDS, neutropenia, anemia, peripheral pulmonary stenosis, metabolic acidosis
5	1, 2	31.57, 32.57	M	2.187, 2.119	Transient tachypnea, hyperbilirubinemia
6	1	32.43	M	0.968	Intrauterine growth restriction (IUGR), RDS, hyperbilirubinemia, metabolic acidosis
7	1, 2, 3	29.14, 30.43, 31	M	0.957, 1.18, 1.51	RDS
8	1, 2	32.14, 33.71	M	1.962, 2.0	Multiple gestation, RDS, narcotic exposure
9	1, 2	32.14, 33.71	M	1.678, 1.737	Multiple gestation, RDS, narcotic exposure
10	1, 2	33.57, 34.43	M	2.047, 2.05	ABO incompatibility, hyperbilirubinemia
11	1	34.43	F	1.75
12	1, 2	29.71, 34.71	M	1.763, 2.459	Hyperbilirubinemia
13	1	34.14	F	1.638	RDS, hyperbilirubinemia, multiple gestation
14	1	34.14	F	1.393	Type C tracheoesophageal fistula with repair, RDS, hyperbilirubinemia, multiple gestation
15	1, 2	32.14, 32.43	M	1.362, 1.36	RDS
16	1	32.43	M	1.874	Hyperbilirubinemia
17	1, 2	30.71, 31.43	M	1.225, 1.272	Apnea, RDS
18	1	29.86	M	1.107	RDS, metabolic acidosis, hyperbilirubinemia, multiple gestation
19	1, 2	28.86, 29.86	M	0.902, 1.058	RDS, metabolic acidosis, multiple gestation
20	1	32.71	F	1.664	Multiple gestation, RDS
21	1	32.71	F	1.584	Multiple gestation, RDS
22	1, 2	36.14, 39.14	F	1.196, 1.445	Intrauterine growth restriction, hyperbilirubinemia, thrombocytopenia
23	1	41.57	M	3.845	RDS, pneumothorax, persistent pulmonary hypertension (PPHN)
24	1	34.57	M	1.989	Apnea, maternal drug exposure
25	1, 2	34.43, 37.29	F	1.668, 2.122	RDS, bronchopulmonary dysplasia (BPD), hyperbilirubinemia, elbow contractures, sacral groove
26	1	32.43	M	1.246	RDS, hyperbilirubinemia, apnea
27	1, 2, 3, 4, 5	28.86, 29.14, 30.57, 31.47, 33.57,	M	1.24, 1.25, 1.472, 1.648, 2.215	RDS, apnea, anemia
28	1, 2	29.57, 32.57	F	1.226, 1.762	Multiple gestation, RDS, apnea, hyperbilirubinemia, bacteremia
29	1, 2, 3	28.86, 30.57, 32.57	F	1.295, 1.344, 1.725	Multiple gestation, RDS, apnea, hyperbilirubinemia
30	1, 2	29, 37	M	1.03, 2.139	RDS, muscular ventricular septal defect (VSD), apnea
31	1	30.86	M	1.56	RDS, hyperbilirubinemia
32	1, 2	30.43, 30.86	F	1.433, 1.451	Apnea, metabolic acidosis, hyperbilirubinemia, Grade 1 IVH
33	1, 2	30.71, 31.57	M	1.135, 1.161	Multiple gestation, hyperbilirubinemia, apnea
34	1, 2	30.71, 31.57	M	1.365, 1.347	Multiple gestation, RDS, hyperbilirubinemia, apnea
35	1, 2, 3, 4	27.43, 28.29, 29.86, 34.43	F	0.93, 0.995, 0.981, 1.476	RDS, PDA, BPD, multiple gestation
36	1, 2, 3	27.43, 28.29, 34.43	F	0.73, 0.78, 1.298	RDS, PDA, BPD, multiple gestation
37	1, 2	25, 28.71	M	0.99, 0.929	RDS, narcotic exposure
38	1, 2	33.43, 36.57	M	1.896, 2.438	RDS, metabolic acidosis, BPD, hypertension, hemangioma
39	1, 2	32.86, 34.29	M	1.849, 2.297	RDS, multiple gestation
40	1, 2	32.43, 37.71	M	0.57, 0.911	Severe and asymmetric IUGR, hypoglycemia, RDS, coagulopathy, thrombocytopenia, multiple gestation
41	1, 2	35.29, 35.86	F	1.508, 1.482	Small for gestational age (SGA), multiple gestation
42	1, 2	35.29, 36.14	F	1.604, 1.775	SGA, hyperbilirubinemia, multiple gestation
43	1, 2	28.43, 29.29	M	1.085, 1.216	RDS, hyperbilirubinemia, apnea, anemia
44	1	29.57	M	1.278	RDS, pneumonia, hyperbilirubinemia
45	1	34.14	F	2.016
46	1	34.14	F	1.003	Laryngomalacia, PDA
47	1	29.29	F	1.06	Urinary tract infection, patent foramen ovale, mild pulmonary valvular stenosis
48	1	35.57	M	1.981	Tracheoesophageal fistula, esophageal and duodenal atresia, intestinal malrotation, ABO incompatibility, hyperbilirubinemia, undescended testicle
49	1	37	F	2.758	BPD
50	1	33.57	M	1.807	Hyperbilirubinemia
51	1	31.71	M	1.794	RDS, polydactyly of right foot
52	1	32.57	M	1.636	Transient tachypnea, hyperbilirubinemia, twin-to-twin transfusion syndrome (donor)
53	1	32.57	M	1.924	Transient tachypnea, hyperbilirubinemia, twin-to-twin transfusion syndrome, (recipient)
54	1	41.29	F	3.676
55	1	35.57	M	2.136
56	1	33.86	F	2.136	RDS
57	1	36.86	F	1.733	IUGR, polycythemia
58	1, 2	34.29, 35.29	M	1.938, 2.208	RDS, hyperbilirubinemia, multiple gestation
59	1, 2	34.29, 35.29	M	2.165, 2.415	RDS, hyperbilirubinemia, multiple gestation
60	1	33.86	F	1.463	IUGR, RDS, hypermagnesia, multiple gestation
61	1, 2	33.71, 34.57	F	2.136, 2.126	RDS, right partial membranous choanal atresia, anal fissure, multiple gestation
62	1	33.86	M	1.65	Twin-to-twin transfusion syndrome (recipient), polycythemia, RDS, thrombocytopenia, mild bilateral hydronephrosis
63	1	33.86	M	1.49	Twin-to-twin transfusion syndrome (donor), anemia, apnea
64	1	38.57	F	3.733
65	1	39	M	3.073
66	1	40.43	F	2.644
67	1	40	F	2.899
68	1	38.57	F	3.621
69	1	39.14	M	3.623
70	1	40.29	M	2.769
71	1	38.86	F	2.996
72	1	39.43	F	3.235
73	1	39.71	M	3.459
74	1	38.43	F	2.785	Multiple gestation
75	1	38.43	M	2.495	Mulitple gestation
76	1	39.71	F	3.91
